# Supplementary material
Source: MDPI journal article supplement (https://www.mdpi.com/1424-2818/15/1/105)
Supplement: s1 [file s1]

**Table S1.** The checklist of the alien invasive plants in Dayao Mountain National Nature Reserve.

| Species Name                       | Family        | Place of Origin                               | Introduction Time |
|------------------------------------|---------------|-----------------------------------------------|-------------------|
| <i>Ageratum conyzoides</i>         | Asteraceae    | Tropical America                              | OLD               |
| <i>Bidens pilosa</i>               | Asteraceae    | Tropical, subtropical<br>America and Asia     | OLD               |
| <i>Erigeron annuus</i>             | Asteraceae    | North America                                 | OLD               |
| <i>Erigeron canadensis</i>         | Asteraceae    | North America                                 | OLD               |
| <i>Dysphania ambrosioides</i>      | Amaranthaceae | Tropical America                              | OLD               |
| <i>Oxalis corymbosa</i>            | Oxalidaceae   | South America                                 | OLD               |
| <i>Crassocephalum crepidioides</i> | Asteraceae    | Africa                                        | NEW               |
| <i>Erechtites valerianifolius</i>  | Asteraceae    | Tropical America                              | NEW               |
| <i>Galinsoga parviflora</i>        | Asteraceae    | South America                                 | NEW               |
| <i>Galinsoga quadriradiata</i>     | Asteraceae    | Mexico                                        | NEW               |
| <i>Praxelis clematidea</i>         | Asteraceae    | South America                                 | NEW               |
| <i>Symphytotrichum subulatum</i>   | Asteraceae    | North America                                 | NEW               |
| <i>Melilotus officinalis</i>       | Fabaceae      | Central Asia, West Asia<br>to Southern Europe | NEW               |
| <i>Paspalum conjugatum</i>         | Poaceae       | Tropical America                              | NEW               |
| <i>Pilea microphylla</i>           | Urticaceae    | Tropical America                              | NEW               |
| <i>Solanum aculeatissimum</i>      | Solanaceae    | Brazil                                        | NEW               |
| <i>Solanum americanum</i>          | Solanaceae    | Americas                                      | NEW               |
| <i>Spermacoce alata</i>            | Rubiaceae     | South America                                 | NEW               |

The time of introduction refers to when the species was first discovered in China, and we distinguish between old invasive exotic herbs (introduced to China before 1900) and new invasive exotic herbs (introduced to China after 1900).

**Table S2.** Plots investigation of herbs in Dayao Mountain National Nature Reserve

| Site | latitude  | longitude  | Altitude | Habitat type                | Grade |
|------|-----------|------------|----------|-----------------------------|-------|
| 1    | 24.0023   | 110.0385   | 1313     | Core area riverside         | 1     |
| 2    | 24.0211   | 110.0512   | 1292     | Near the parking lot        | 4     |
| 3    | 24.9734   | 110.1123   | 1219     | Abandoned houses            | 3     |
| 4    | 24.970374 | 110.118638 | 1094     | Asphalt roadside            | 2     |
| 5    | 23.97722  | 110.117819 | 998      | Asphalt roadside            | 2     |
| 6    | 23.982291 | 110.118481 | 908      | Asphalt roadside            | 2     |
| 7    | 23.980618 | 110.121888 | 808      | Abandoned land              | 3     |
| 8    | 23.980715 | 110.128052 | 754      | Protected area boundary     | 3     |
| 9    | 24.2157   | 110.3556   | 350      | Asphalt roadside            | 2     |
| 10   | 24.214448 | 110.357607 | 338      | Riverside trestle           | 2     |
| 11   | 24.213499 | 110.354322 | 336      | Abandoned houses            | 3     |
| 12   | 24.209491 | 110.353554 | 292      | Asphalt roadside            | 2     |
| 13   | 24.144981 | 110.239331 | 1002     | Protection station roadside | 4     |
| 14   | 24.1507   | 110.2358   | 1059     | Asphalt roadside            | 2     |
| 15   | 24.152678 | 110.233106 | 1092     | Asphalt roadside            | 2     |
| 16   | 24.240074 | 110.26639  | 622      | Asphalt roadside            | 2     |
| 17   | 24.2393   | 110.2659   | 596      | Asphalt roadside            | 2     |
| 18   | 24.237033 | 110.265427 | 535      | Asphalt roadside            | 2     |
| 19   | 24.234651 | 110.266804 | 511      | Abandoned houses            | 3     |
| 20   | 24.230461 | 110.265865 | 505      | Abandoned houses            | 3     |
| 21   | 24.168732 | 110.244034 | 1176     | Riverside trestle           | 2     |
| 22   | 24.1744   | 110.2428   | 1148     | Abandoned farming plant     | 3     |
| 23   | 24.020557 | 110.248887 | 509      | Asphalt roadside            | 2     |
| 24   | 24.019852 | 110.252469 | 550      | Asphalt roadside            | 2     |
| 25   | 24.017687 | 110.251452 | 563      | Asphalt roadside            | 2     |
| 26   | 24.156289 | 110.109074 | 909      | Near the weather station    | 3     |
| 27   | 24.14938  | 110.111265 | 962      | Abandoned houses            | 3     |
| 28   | 24.144569 | 110.107016 | 707      | Protected area boundary     | 3     |
| 29   | 24.1392   | 110.103172 | 630      | Scenic area entrance        | 3     |
| 30   | 23.911808 | 110.035903 | 862      | Asphalt roadside            | 2     |
| 31   | 23.908909 | 110.043528 | 824      | Park roadside               | 3     |
| 32   | 23.9008   | 110.0464   | 879      | Asphalt roadside            | 2     |
| 33   | 23.897148 | 110.044587 | 919      | Protected area boundary     | 3     |

The habitat types around the sample sites are classified as (I) stony walkways for pedestrians only; (II) asphalt or tarmac roads for vehicles and pedestrians; (III) abandoned land and abandoned houses, etc.; and (IV) sites with high human impact such as planted forests and scenic parking lots. They were

estimated as 4 grade scale: 1 = no significant interference, 2 = weak interference, 3 = moderate interference, 4 = heavy interference.

**Table S3.** Linear mixed models constructed for native herbs, all invasive alien herbs, new and old invasive alien herbs richness and various environmental factors at the altitude gradient of the reserve.

| Species Category         | Environment Variables               | t      | P      | Explained Variance (%) |
|--------------------------|-------------------------------------|--------|--------|------------------------|
| Native herbs             | Mean temperature of warmest quarter | 2.113  | 0.043  | 70.18                  |
|                          | Annual precipitation                | 0.441  | 0.662  | 15.21                  |
|                          | Interference intensity              | -0.773 | 0.445  | 9.77                   |
|                          | Dis. human settlement               | -0.775 | 0.445  | 4.84                   |
| All invasive alien herbs | Mean temperature of warmest quarter | -2.583 | 0.015  | 34.82                  |
|                          | Annual precipitation                | 1.217  | 0.234  | 17.94                  |
|                          | Interference intensity              | 3.330  | 0.002  | 39.71                  |
|                          | Dis. human settlement               | -0.440 | 0.663  | 7.54                   |
| New invasive alien herbs | Mean temperature of warmest quarter | -3.759 | <0.001 | 53.49                  |
|                          | Annual precipitation                | -1.394 | 0.173  | 6.56                   |
|                          | Interference intensity              | 2.555  | 0.016  | 34.15                  |
|                          | Dis. human settlement               | 0.272  | 0.787  | 5.80                   |
| Old invasive alien herbs | Mean temperature of warmest quarter | 0.778  | 0.443  | 3.50                   |
|                          | Annual precipitation                | 1.291  | 0.207  | 46.95                  |
|                          | Interference intensity              | 1.451  | 0.157  | 43.27                  |
|                          | Dis. human settlement               | -0.532 | 0.599  | 6.28                   |

**Table S4.** Information on herbs species in plots of Dayao Mountain National Nature Reserve.

| <b>Plot Number</b> | <b>Invasive Alien<br/>Herbs</b> | <b>Native<br/>Herbs</b> | <b>Total Herbs</b> | <b>Elevation<br/>(m a.s.l.)</b> |
|--------------------|---------------------------------|-------------------------|--------------------|---------------------------------|
| 1-1                | 1                               | 3                       | 4                  | 1313                            |
| 1-2                | 1                               | 6                       | 7                  | 1313                            |
| 1-3                | 1                               | 4                       | 5                  | 1313                            |
| 2-1                | 4                               | 10                      | 14                 | 1292                            |
| 2-2                | 2                               | 9                       | 11                 | 1292                            |
| 2-3                | 3                               | 8                       | 11                 | 1292                            |
| 3-1                | 3                               | 6                       | 9                  | 1219                            |
| 3-2                | 1                               | 10                      | 11                 | 1219                            |
| 3-3                | 3                               | 4                       | 7                  | 1219                            |
| 3-4                | 3                               | 3                       | 6                  | 1219                            |
| 4-1                | 1                               | 9                       | 10                 | 1094                            |
| 4-2                | 1                               | 3                       | 4                  | 1094                            |
| 4-3                | 1                               | 3                       | 4                  | 1094                            |
| 5-1                | 3                               | 1                       | 4                  | 998                             |
| 5-2                | 3                               | 4                       | 7                  | 998                             |
| 5-3                | 3                               | 3                       | 6                  | 998                             |
| 6-1                | 2                               | 6                       | 8                  | 908                             |
| 6-2                | 2                               | 9                       | 11                 | 908                             |
| 6-3                | 2                               | 6                       | 8                  | 908                             |
| 7-1                | 2                               | 1                       | 3                  | 808                             |
| 7-2                | 2                               | 2                       | 4                  | 808                             |
| 7-3                | 2                               | 6                       | 8                  | 808                             |
| 7-4                | 2                               | 6                       | 8                  | 808                             |
| 7-5                | 3                               | 7                       | 10                 | 808                             |
| 7-6                | 3                               | 3                       | 6                  | 808                             |
| 8-1                | 1                               | 3                       | 4                  | 754                             |
| 8-2                | 2                               | 3                       | 5                  | 754                             |
| 8-3                | 1                               | 4                       | 5                  | 754                             |
| 9-1                | 1                               | 5                       | 6                  | 350                             |
| 9-2                | 1                               | 8                       | 9                  | 350                             |
| 9-3                | 1                               | 6                       | 7                  | 350                             |
| 10-1               | 2                               | 9                       | 11                 | 338                             |
| 10-2               | 1                               | 6                       | 7                  | 338                             |
| 10-3               | 1                               | 5                       | 6                  | 338                             |
| 11-1               | 1                               | 2                       | 3                  | 336                             |

|      |   |    |    |      |
|------|---|----|----|------|
| 11-2 | 1 | 4  | 5  | 336  |
| 11-3 | 2 | 4  | 6  | 336  |
| 12-1 | 1 | 6  | 7  | 292  |
| 12-2 | 2 | 17 | 19 | 292  |
| 12-3 | 1 | 11 | 12 | 292  |
| 13-1 | 3 | 6  | 9  | 1002 |
| 13-2 | 2 | 5  | 7  | 1002 |
| 13-3 | 3 | 4  | 7  | 1002 |
| 14-1 | 5 | 6  | 11 | 1059 |
| 14-2 | 3 | 7  | 10 | 1059 |
| 14-3 | 4 | 7  | 11 | 1059 |
| 15-1 | 4 | 5  | 9  | 1092 |
| 15-2 | 2 | 4  | 6  | 1092 |
| 15-3 | 3 | 6  | 9  | 1092 |
| 16-1 | 4 | 5  | 9  | 622  |
| 16-2 | 4 | 7  | 11 | 622  |
| 16-3 | 4 | 5  | 9  | 622  |
| 17-1 | 1 | 3  | 4  | 596  |
| 17-2 | 2 | 3  | 5  | 596  |
| 17-3 | 3 | 6  | 9  | 596  |
| 18-1 | 1 | 3  | 4  | 535  |
| 18-2 | 1 | 7  | 8  | 535  |
| 18-3 | 2 | 2  | 4  | 535  |
| 19-1 | 2 | 5  | 7  | 511  |
| 19-2 | 4 | 9  | 13 | 511  |
| 19-3 | 1 | 5  | 6  | 511  |
| 20-1 | 2 | 2  | 4  | 505  |
| 20-2 | 2 | 5  | 7  | 505  |
| 20-3 | 2 | 3  | 5  | 505  |
| 21-1 | 4 | 4  | 8  | 1176 |
| 21-2 | 3 | 8  | 11 | 1176 |
| 21-3 | 2 | 7  | 9  | 1176 |
| 22-1 | 4 | 7  | 11 | 1148 |
| 22-2 | 5 | 4  | 9  | 1148 |
| 22-3 | 2 | 2  | 4  | 1148 |
| 23-1 | 2 | 10 | 12 | 509  |
| 23-2 | 1 | 8  | 9  | 509  |
| 23-3 | 1 | 8  | 9  | 509  |

|      |   |    |    |     |
|------|---|----|----|-----|
| 24-1 | 1 | 7  | 8  | 550 |
| 24-2 | 2 | 10 | 12 | 550 |
| 24-3 | 2 | 8  | 10 | 550 |
| 25-1 | 1 | 13 | 14 | 563 |
| 25-2 | 1 | 10 | 11 | 563 |
| 25-3 | 2 | 17 | 19 | 563 |
| 26-1 | 1 | 5  | 6  | 909 |
| 26-2 | 4 | 6  | 10 | 909 |
| 26-3 | 6 | 6  | 12 | 909 |
| 26-4 | 2 | 4  | 6  | 909 |
| 26-5 | 3 | 6  | 9  | 909 |
| 27-1 | 4 | 3  | 7  | 962 |
| 27-2 | 3 | 0  | 3  | 962 |
| 27-3 | 3 | 1  | 4  | 962 |
| 28-1 | 3 | 1  | 4  | 707 |
| 28-2 | 3 | 3  | 6  | 707 |
| 28-3 | 3 | 2  | 5  | 707 |
| 29-1 | 2 | 5  | 7  | 630 |
| 29-2 | 2 | 5  | 7  | 630 |
| 29-3 | 2 | 9  | 11 | 630 |
| 30-1 | 2 | 2  | 4  | 862 |
| 30-2 | 2 | 2  | 4  | 862 |
| 30-3 | 1 | 3  | 4  | 862 |
| 31-1 | 2 | 3  | 5  | 824 |
| 31-2 | 3 | 3  | 6  | 824 |
| 31-3 | 4 | 5  | 9  | 824 |
| 32-1 | 3 | 1  | 4  | 879 |
| 32-2 | 1 | 3  | 4  | 879 |
| 32-3 | 2 | 2  | 4  | 879 |
| 33-1 | 2 | 6  | 8  | 919 |
| 33-2 | 2 | 4  | 6  | 919 |
| 33-3 | 2 | 5  | 7  | 919 |

---

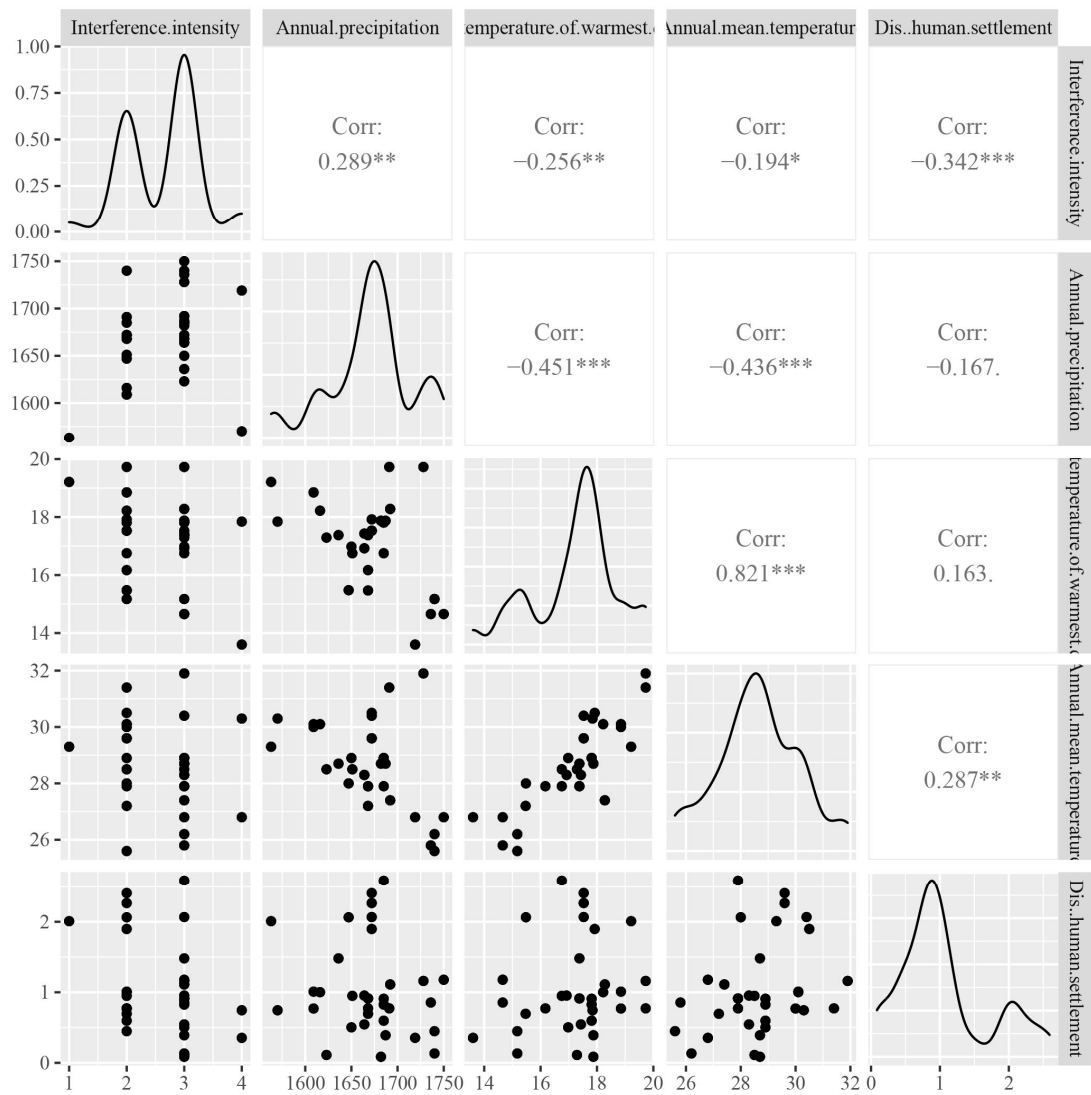

**Figure S1.** Results of correlation analysis of explanatory variables. Values above 0.7 are considered to have a strong covariance between variables. \* $P < 0.05$ , \*\* $P < 0.01$ , \*\*\* $P < 0.001$ .
